# Supplementary material for: A smartphone-based electrochemical POCT for CEA based on signal amplification of Zr6MOFs
Source: Royal Society of Chemistry journal article supplement (doi:10.1039/d3lc00748k), 2023-12-13
Supplement: d3lc00748k1.pdf [file d3lc00748k1.pdf]

## Supplementary Information

### A smartphone-based electrochemical POCT for CEA based on signal amplification of Zr<sub>6</sub>MOFs

Shan-Shan Shi<sup>a,b</sup>, Xiao-Jian Li<sup>b</sup>, Rong-Na Ma<sup>b</sup>, Lei Shang<sup>b</sup>, Wei Zhang<sup>b</sup>, Huai-Qing Zhao<sup>a,\*</sup>, Li-Ping Jia<sup>b,\*</sup>, Huai-Sheng Wang<sup>b,\*</sup>

<sup>a</sup>School of Chemistry and Chemical Engineering, University of Jinan, Jinan, Shandong, 250022, P. R. China

<sup>b</sup>College of Chemistry and Chemical Engineering, Liaocheng University, Liaocheng, 252000, P. R. China

\*Corresponding author.

Email: chm\_zhaohq@ujn.edu.cn; jialiping@lcu.edu.cn; hswang@lcu.edu.cn

## **Contents**

|                                                                             |    |
|-----------------------------------------------------------------------------|----|
| 1. Materials and instruments                                                | S3 |
| 2. Synthesis of Zr <sub>6</sub> MOFs and Fc-DNA/Zr <sub>6</sub> MOFs        | S5 |
| 3. Characterization of Zr <sub>6</sub> MOFs and Fc-DNA/Zr <sub>6</sub> MOFs | S6 |
| 4. Comparison of Different Methods of CEA Detection                         | S8 |
| References                                                                  | S9 |

## 1. Materials and instruments

### Materials.

Zirconyl chloride octahydrate ( $\text{ZrOCl}_2 \cdot 8\text{H}_2\text{O}$ ), benzoic acid, tetrakis (4-carboxyphenyl) porphyrin ( $\text{H}_2\text{T CPP}$ ) were purchased from Shanghai Macklin Biochemical Co., Ltd. (China). CEA was purchased from Shanghai Linc-Bio Science Co. Ltd (Shanghai, China). Chloroauric acids ( $\text{HAuCl}_4$ ) was obtained from Macklin Biochemical Co., Ltd.(Shanghai, China). Tris (2-carboxyethyl) phosphine hydrochloride (TCEP) were purchased from Aladdin Inc. (Shanghai, China). 6-Mercapto-1-hexanol (MCH), NaCl, KCl and  $\text{MgCl}_2$  were obtained from Shanghai Reagent Corporation (China). Human alpha fetoprotein (AFP), prostate specific antigen (PSA) and human immunoglobulin G (HIgG) were purchased from Linc-Bio Science Co. Ltd. (Shanghai, China). Human serum albumin (HSA) and thrombin were obtained from Sigma-Aldrich. All chemical reagents were analytical grade and used without further purification. Milli-Q water ( $18 \text{ m}\Omega \cdot \text{cm}$  resistivity) obtained from a Millipore system was employed to prepare all solutions.

All oligonucleotides with sequences listed below were purchased at Shanghai Sangon Biological Engineering Technology & Services Co., Ltd. (Shanghai, China):

Aptamer: 5'-ATACCAGCTTATTCAATT-3'

cDNA: 5'-SH-( $\text{CH}_2$ )<sub>6</sub>-TTTTTTAATTGAATAAGCTGGTAT-3'

Fc-DNA: 5'-ATACCAGCTTATTCAATT-Fc-3'

The solution used in this work was as follows: Phosphate buffered saline (0.1 M PBS, pH 7.4) consists of 0.1 M  $\text{Na}_2\text{HPO}_4$  and 0.1 M  $\text{NaH}_2\text{PO}_4$  for electrochemical process; DNA hybridization buffer (pH 8.0, 50 mM Tris base, 5 mM  $\text{MgCl}_2$  and 100 mM NaCl).

### Instruments

All electrochemical measurements were performed with a portable Sensit Smart USB (PalmSens, Netherlands). The morphologies of synthesized materials were characterized with a field emission scanning electron microscope (Thermo Fisher

Scientific FIB-SEM GX4(10.16.0.97)). Transmission electron microscopy (TEM) images were obtained on a FEI G2 electron microscope operating at 200 kV. Dynamic light scattering (DLS) and Zeta potential were measured on a Zetasizer Nano ZSP (Malvern Instrument Ltd, UK). X-ray diffraction (XRD) (SmartLab 9 kW) was performed on a D/MAX-TTRIII(CBO) series XRD instrument at 40 kV and 200 mA.

## 2. Synthesis of Zr<sub>6</sub>MOFs and Fc-DNA/Zr<sub>6</sub>MOFs

Zr<sub>6</sub>MOFs were synthesized according to the literature method.<sup>1,2</sup> Briefly, H<sub>2</sub>TCPP (0.13 mmol), ZrOCl<sub>2</sub>•8H<sub>2</sub>O (0.93 mmol), and benzoic acid (23 mmol) were dissolved in 100 mL of DMF in a 250 mL round-bottom flask, and the solution was stirred at 90 °C for 5 h. The formed Zr<sub>6</sub>MOFs were purified by repeated washing with DMF, and redispersed in DMF for further use.

Purified Zr<sub>6</sub>MOFs suspended in DMF were solvent exchanged with Milli-Q water thoroughly to remove remaining DMF. 0.5 mL Fc-DNA solution (30 μM) was slowly added into Zr<sub>6</sub>MOFs suspension, and the solution was vigorously stirred overnight. Afterward, 100 μL Tris buffer (pH 7.4, 50 mM Tris base, 100 mM NaCl) was slowly added to the mixture under stirring, respectively. After brief sonication and further incubation, the mixture was transferred to a microtube, free DNA was recovered from the Fc-DNA/Zr<sub>6</sub>MOFs suspension by centrifugation and washing.

### 3. Characterization of Zr<sub>6</sub>MOFs and Fc-DNA/Zr<sub>6</sub>MOFs

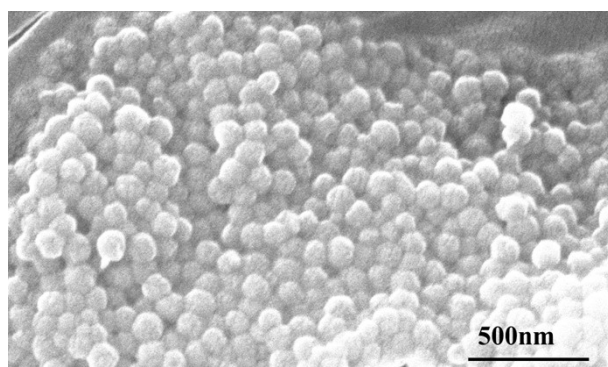

Fig. S1. SEM images of the Zr<sub>6</sub>MOFs

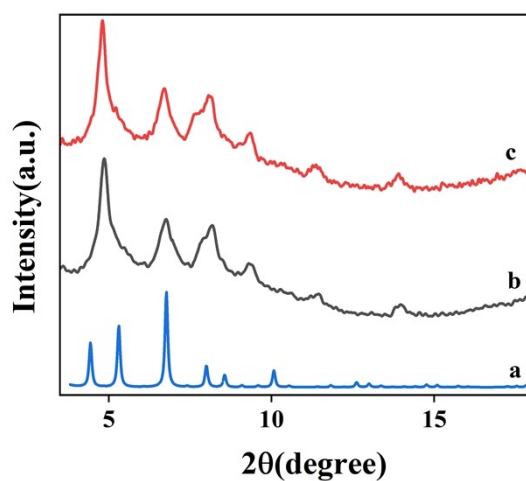

Fig. S2. PXRD of (a) simulated data of Zr<sub>6</sub>MOFs, (b) Zr<sub>6</sub>MOFs and (c) Fc-DNA/Zr<sub>6</sub>MOFs

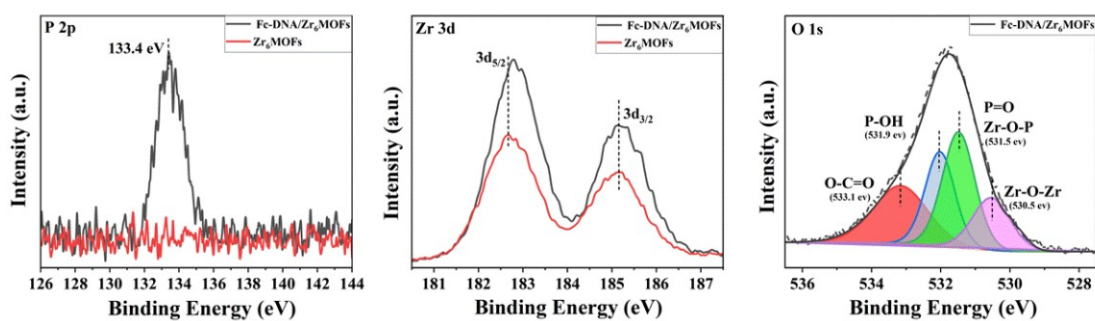

Fig. S3. P 2p, Zr 3d, and O 1s XPS spectra of Zr<sub>6</sub>MOFs and Fc-DNA/Zr<sub>6</sub>MOFs.

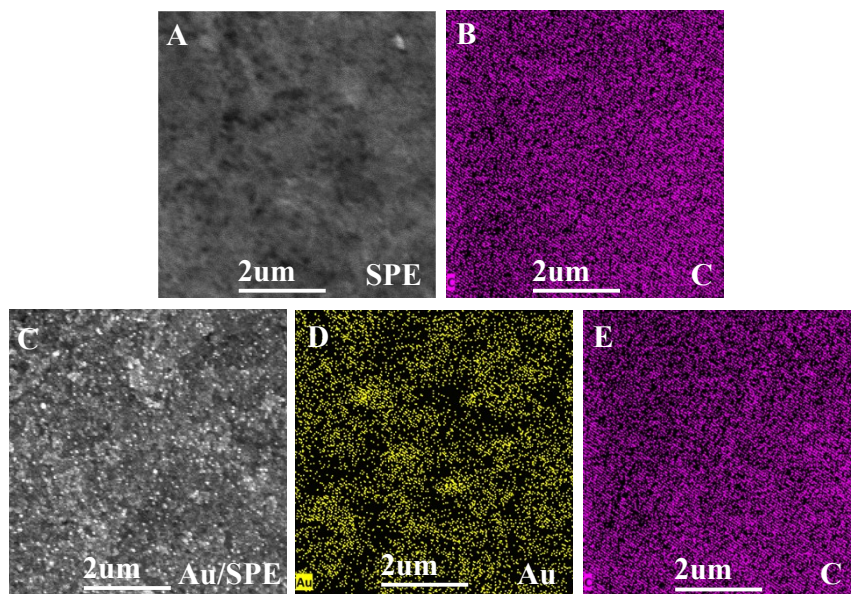

**Fig. S4.** SEM mapping of bare SPE (A, B) and Au/SPE (C-E).

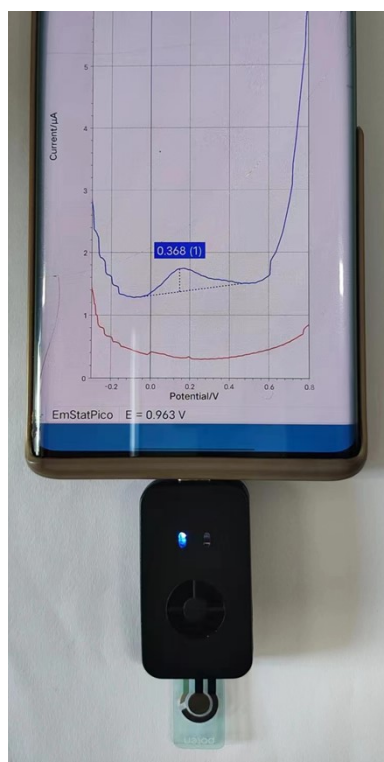

**Fig. S5.** The smartphone-based electrochemical POCT platform.

**Table S1.** Comparison of the analytical performances of the developed aptasensor and various reported methods .

| <b>Methods</b>                          | <b>Time</b><br>(T <sub>CEA</sub> + T <sub>signal</sub> ) | <b>Linear range</b><br>(ng·mL <sup>-1</sup> ) | <b>Detection limit</b><br>(pg·mL <sup>-1</sup> ) | <b>Reference</b><br><b>s</b> |
|-----------------------------------------|----------------------------------------------------------|-----------------------------------------------|--------------------------------------------------|------------------------------|
| Fluoroimmunoassay                       | 30 + 0 min                                               | 0.5 - 120                                     | 210                                              | 3                            |
| Colorimetric detection                  | 30 + 0 min                                               | 50 - 1000                                     | 5 × 10 <sup>4</sup>                              | 4                            |
| Color encoded assay                     | 40 + 40 min                                              | 0.5 - 100                                     | 500                                              | 5                            |
| Electrochemical immunoassay             | 4 h                                                      | 0.01 - 50                                     | 6.2                                              | 6                            |
| Electrochemical impedimetric biosensors | 120 + 0 min                                              | 0.00002 - 20                                  | 0.01                                             | 7                            |
| Electrochemiluminescence                | 2 h + 2h                                                 | 0.0001 - 100                                  | 0.0389                                           | 8                            |
| Electrochemical aptasensor              | 30 + 2 min                                               | 0.03 - 6.00                                   | 5.38                                             | 9                            |
| Electrochemical aptasensor              | 30 + 30 min                                              | 1 - 5000                                      | 210                                              | 10                           |
| Electrochemical aptasensor              | 40 + 0 min                                               | 0.001 - 5.0                                   | 0.74                                             | 11                           |
| <b>Electrochemical aptasensor</b>       | 45 + 60 min                                              | <b>0.001 - 100</b>                            | <b>0.33</b>                                      | <b>This work</b>             |



## References

- (1) C. Li, C.J. Liu, R. Liu, Y.X. Wang, A.Y. Li, S. Tian, W. Cheng, S.J. Ding, W.T. Li, M. Zhao, Q.F. Xia, *Biosens. Bioelectron.* 2023, 225, 115098.
- (2) K.H. Yu, T.X. Wei, Z.J. Li, J.Y. Li, Z.Y. Wang, Z.H. Dai, *J. Am. Chem. Soc.* 2020, 142, 21267.
- (3) S.H. Xu, X.Y. Feng, T. Gao, G.F. Liu, Y.N. Mao, J.H. Lin, X.J. Yu, X.L. Luo, *Anal. Chim. Acta.* 2017, 983, 173 - 180.
- (4) L. Zhao, J. Wang, D. Su, Y. Zhang, H. Lu, X. Yan, J. Bai, Y. Gao, G. Lu, *Nanoscale.* 2020, 12, 19420–19428.
- (5) J. Ma, L. Zhan, R.S. Li, P.F. Gao, C.Z. Huang, *Anal. Chem.* 2017, 89, 16, 8484–8489.
- (6) T. Hu, Z.H. Wu, W. Sang, B. Ding, K. Chen, X. Li, Y. Shen, Z.H. Ni, *J. Mater. Chem. B* 2022, 10, 6928.
- (7) S. Xu, R.L. Zhang, W. Zhao, Y. Zhu, W. Wei, X.Y. Liu, J. Luo, *Biosens. Bioelectron.* 2017, 92, 570-576.
- (8) D. Zhang, M. Gao, X.D. Xue, X. Ren, R. Feng, D. Wu, X.J. Liu, Q. Wei, *Talanta* 2024, 267, 125239.
- (9) J. Zheng, J. Wang, D. Song, J. Xu, M. Zhang, *ACS Appl. Nano Mater.* 2020, 3, 3449–3458.
- (10) G. Paniagua, A. Villalonga, M. Eguilaz, B. Vegas, C. Parrado, G. Rivas, P. Diez, R. Villalonga, *Anal. Chim. Acta.* 2019, 1061, 84–91.
- (11) L. He, Z. Li, C. Guo, B. Hu, M. Wang, Z. Zhang, M. Du, *Sens. Actuators B. Chem.* 2019, 298, 126852.
